# Supplementary material for: Cryo-EM of Aβ fibrils from mouse models find tg-APPArcSwe fibrils resemble those found in patients with sporadic Alzheimer’s disease
Source: PubMed Central journal article supplement (PMC10689242; doi:10.1038/s41593-023-01484-4), 2023-11-16
Supplement: 41593_2023_1484_MOESM1_ESM.pdf [file 41593_2023_1484_MOESM1_ESM.pdf]

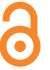

# Cryo-EM of A $\beta$ fibrils from mouse models find tg-APP<sub>ArcSwe</sub> fibrils resemble those found in patients with sporadic Alzheimer's disease

In the format provided by the authors and unedited

# Cryo-EM of A $\beta$ Fibrils from Mouse Models find tg-APP<sub>ArcSwe</sub> fibrils resemble those found in sporadic Alzheimer's disease patients

## SUPPLEMENTARY DATA

5

Mara Zielinski<sup>1,2\*</sup>, Fernanda S. Peralta Reyes<sup>3\*</sup>, Lothar Gremer<sup>1,2,3§</sup>, Sarah Schemmert<sup>1</sup>, Benedikt Frieg<sup>1,2</sup>, Luisa U. Schäfer<sup>1,2</sup>, Antje Willuweit<sup>4</sup>, Lili Donner<sup>5</sup>, Margitta Elvers<sup>5</sup>, Lars N. G. Nilsson<sup>6</sup>, Stina Syvänen<sup>7</sup>, Dag Sehlin<sup>7</sup>, Martin Ingelsson<sup>7,8,9</sup>, Dieter Willbold<sup>1,2,3§</sup>, Gunnar F. Schröder<sup>1,2,10§</sup>

10

<sup>1</sup>Institute of Biological Information Processing, Structural Biochemistry (IBI-7), Forschungszentrum Jülich, Jülich, Germany

<sup>2</sup>JuStruct, Jülich Center for Structural Biology, Forschungszentrum Jülich, Jülich, Germany

<sup>3</sup>Institut für Physikalische Biologie, Heinrich Heine University Düsseldorf, Düsseldorf, Germany

15

<sup>4</sup>Institute of Neuroscience and Medicine, Medical Imaging Physics (INM-4), Forschungszentrum Jülich GmbH, Jülich, Germany

<sup>5</sup>Department of Vascular- and Endovascular Surgery, University Hospital Düsseldorf, Heinrich-Heine University, Düsseldorf, Germany

<sup>6</sup>Department of Pharmacology, Institute of Clinical Medicine, University of Oslo and Oslo University Hospital, Oslo, Norway

20

<sup>7</sup>Department of Public Health and Caring Sciences, Molecular Geriatrics, Rudbeck Laboratory, Uppsala University, Uppsala, Sweden

<sup>8</sup>Krembil Brain Institute, University Health Network, Toronto, Ontario, Canada

<sup>9</sup>Tanz Centre for Research in Neurodegenerative Diseases, Departments of Medicine and Laboratory Medicine & Pathobiology, University of Toronto, Toronto, Ontario, Canada

25

<sup>10</sup>Physics Department, Heinrich Heine University Düsseldorf, Düsseldorf, Germany.

§corresponding authors.

\*These authors contributed equally to this work

LUS current address: Life and Medical Sciences (LIMES) Institute, University of Bonn, Germany

**This file includes:**

Supplementary Figures 1-6

Supplementary Table 1

## Supplementary figures

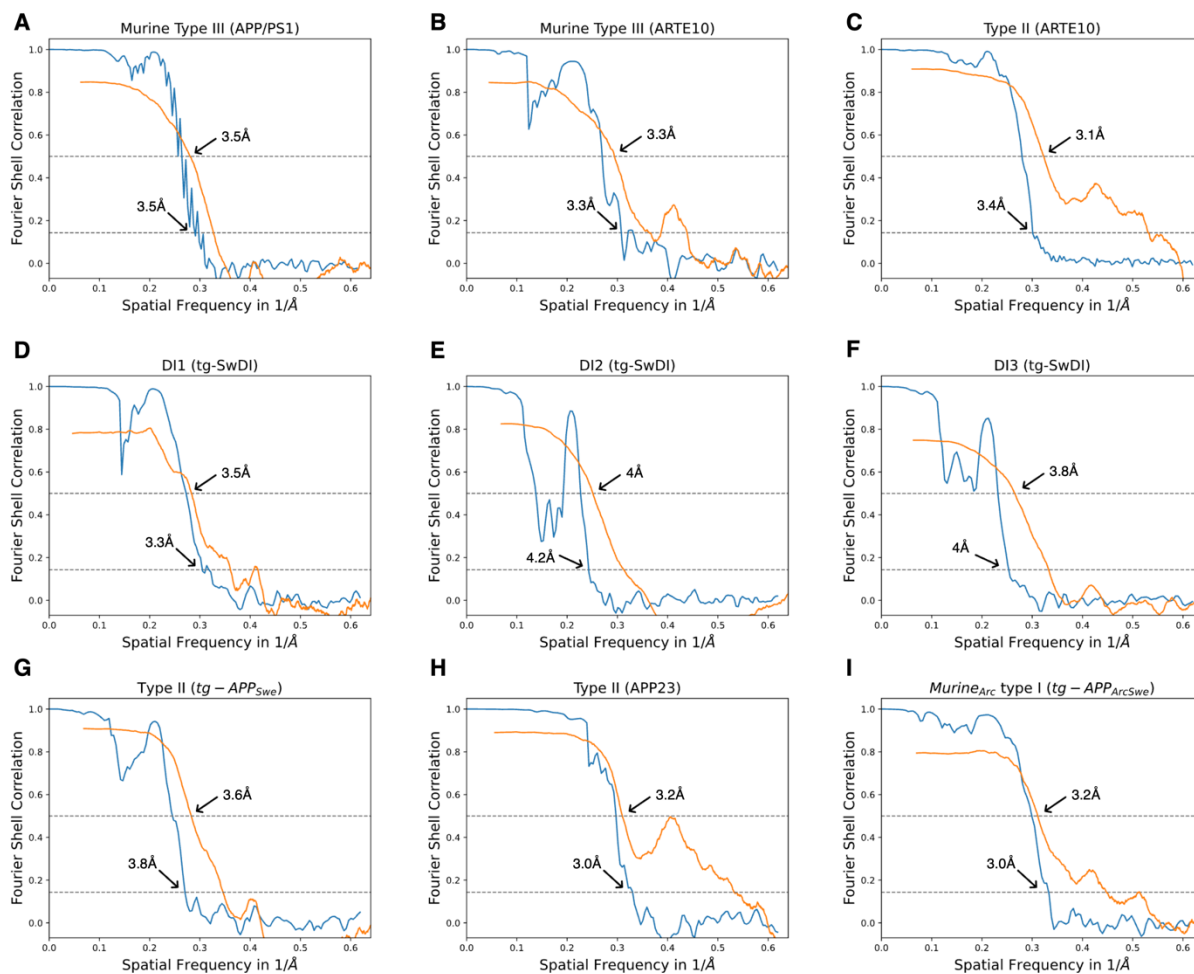

**Figure S1:** FSC curves for cryo-EM maps and structures of (A) APP/PS1 murine type III, (B) ARTE10 murine type III, (C) ARTE 10 type II, (D) DI1, (E) DI2, (F) DI3, (G) tg-APP<sub>Swe</sub> type II, (H) APP23 type II, and (I) tg-APP<sub>ArcSwe</sub> murine<sub>Arc</sub> type I fibrils. FSC curves for two independently refined half maps are shown in blue; FSC curves for the refined atomic model against the final cryo-EM map in orange.

5

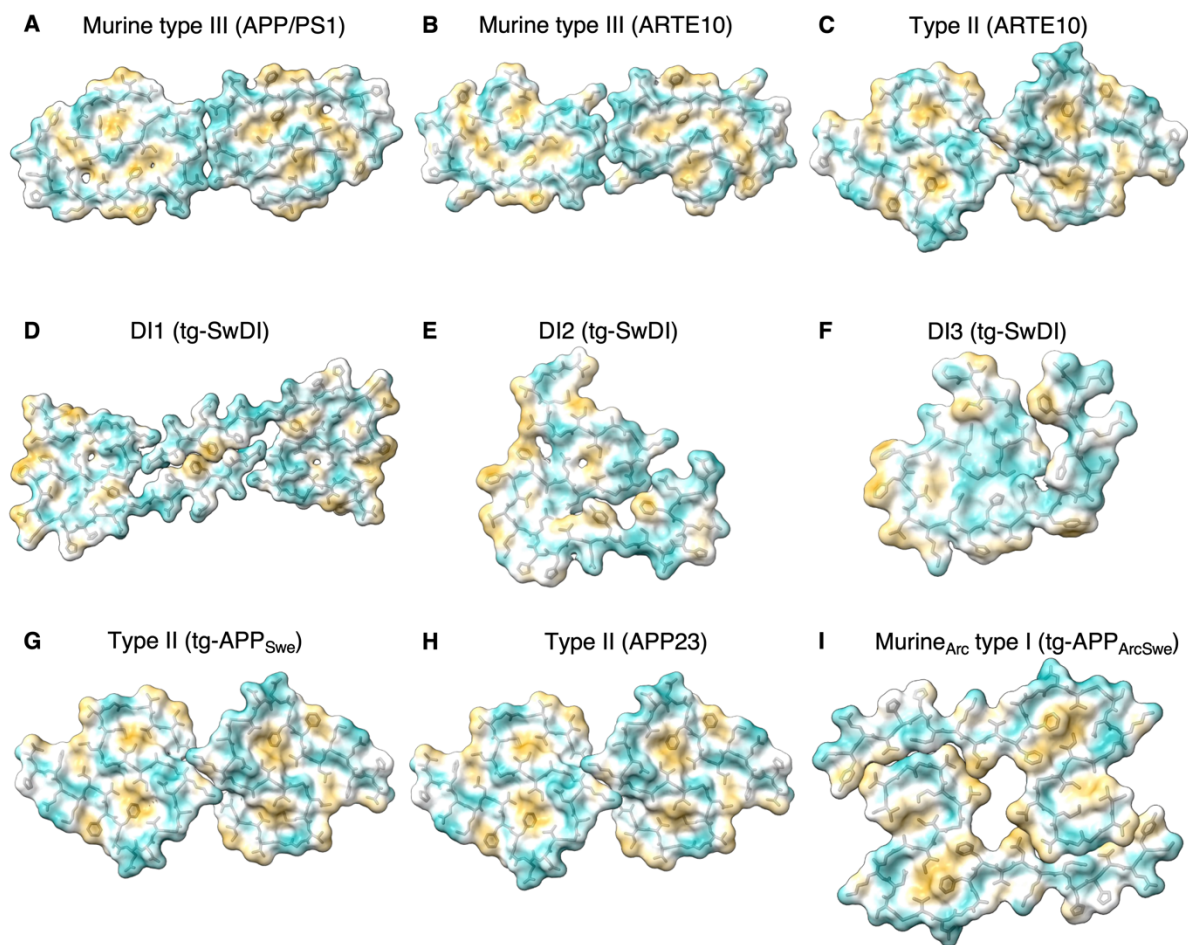

**Figure S2:** Molecular lipophilicity potential (MLP) maps for (A) APP/PS1 murine type III, (B) ARTE10 murine type III, (C) ARTE10 type II, (D) DI1, (E) DI2, (F) DI3, (G) tg-APP<sub>Swe</sub> type III, (H) APP23 type II, and (J) murine<sub>Arc</sub> type I. Coloring on the surface ranging from cyan (most hydrophilic) to white to yellow (most lipophilic/hydrophobic).

5

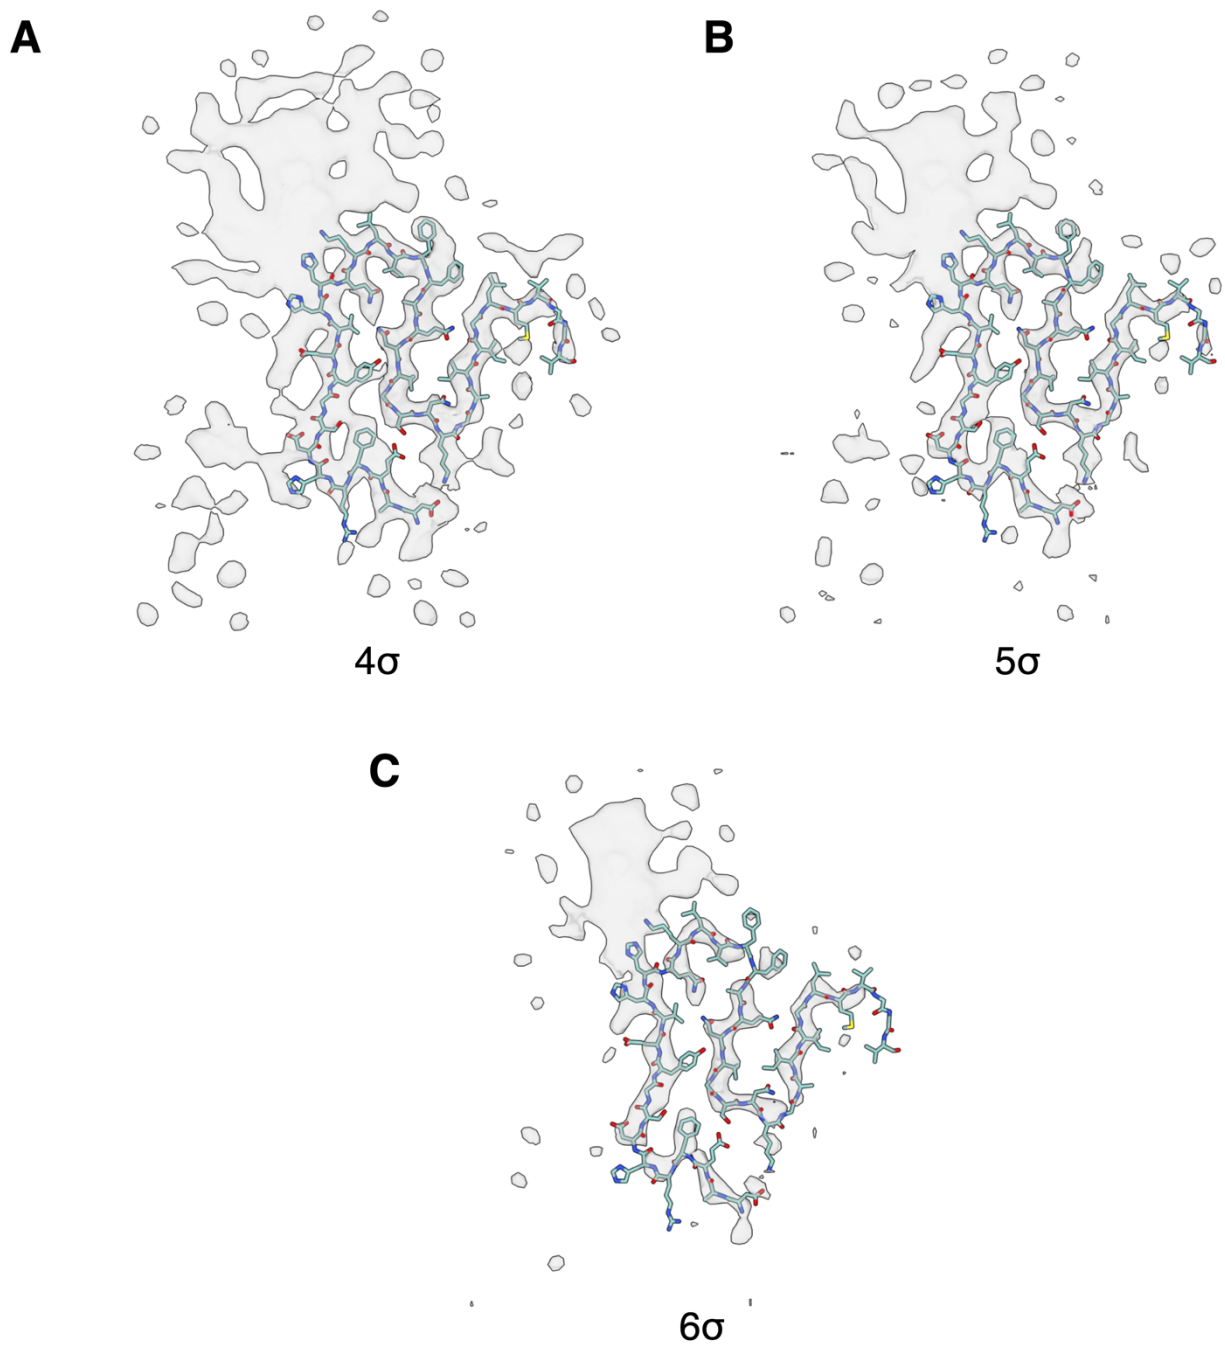

**Figure S3:** DI2 density map at different thresholds. At (A)  $4\sigma$ , (B)  $5\sigma$ , and (C)  $6\sigma$

**A**

|   | C <sub>free</sub> | C <sub>work</sub> |       | 1                                                                                   | 39    |
|---|-------------------|-------------------|-------|-------------------------------------------------------------------------------------|-------|
| 1 | 0.10151           | 0.84414           |       | D A E F R H D S G Y E V H H Q K L V F F A E D V G S N K G A I I G L M V G G V       | V I A |
| 2 | 0.09942           | 0.78261           | A I V | V G G V M L G I I A G K N S G V D E A F F V L K Q H H V E Y G S D H R F E A D       |       |
| 3 | 0.07265           | 0.80838           | D A   | E F R H D S G Y E V H H Q K L V F F A E D V G S N K G A I I G L M V G G V I A       |       |
| 4 | 0.07157           | 0.80478           | D A E | F R H D S G Y E V H H Q K L V F F A E D V G S N K G A I I G L M V G G V V I A       |       |
| 5 | 0.07024           | 0.82736           | D A E | F R H D S G Y E V H H Q K L V F F A E D V G S N K G A I I G L M V G G V V I A       |       |
| 6 | 0.06892           | 0.78052           |       | A I V V G G V M L G I I A G K N S G V D E A F F V L K Q H H V E Y G S D H R F E A D |       |
| 7 | 0.06431           | 0.79885           | A I   | V V G G V M L G I I A G K N S G V D E A F F V L K Q H H V E Y G S D H R F E A D     |       |
| 8 | 0.06263           | 0.79658           | A I   | V V G G V M L G I I A G K N S G V D E A F F V L K Q H H V E Y G S D H R F E A D     |       |

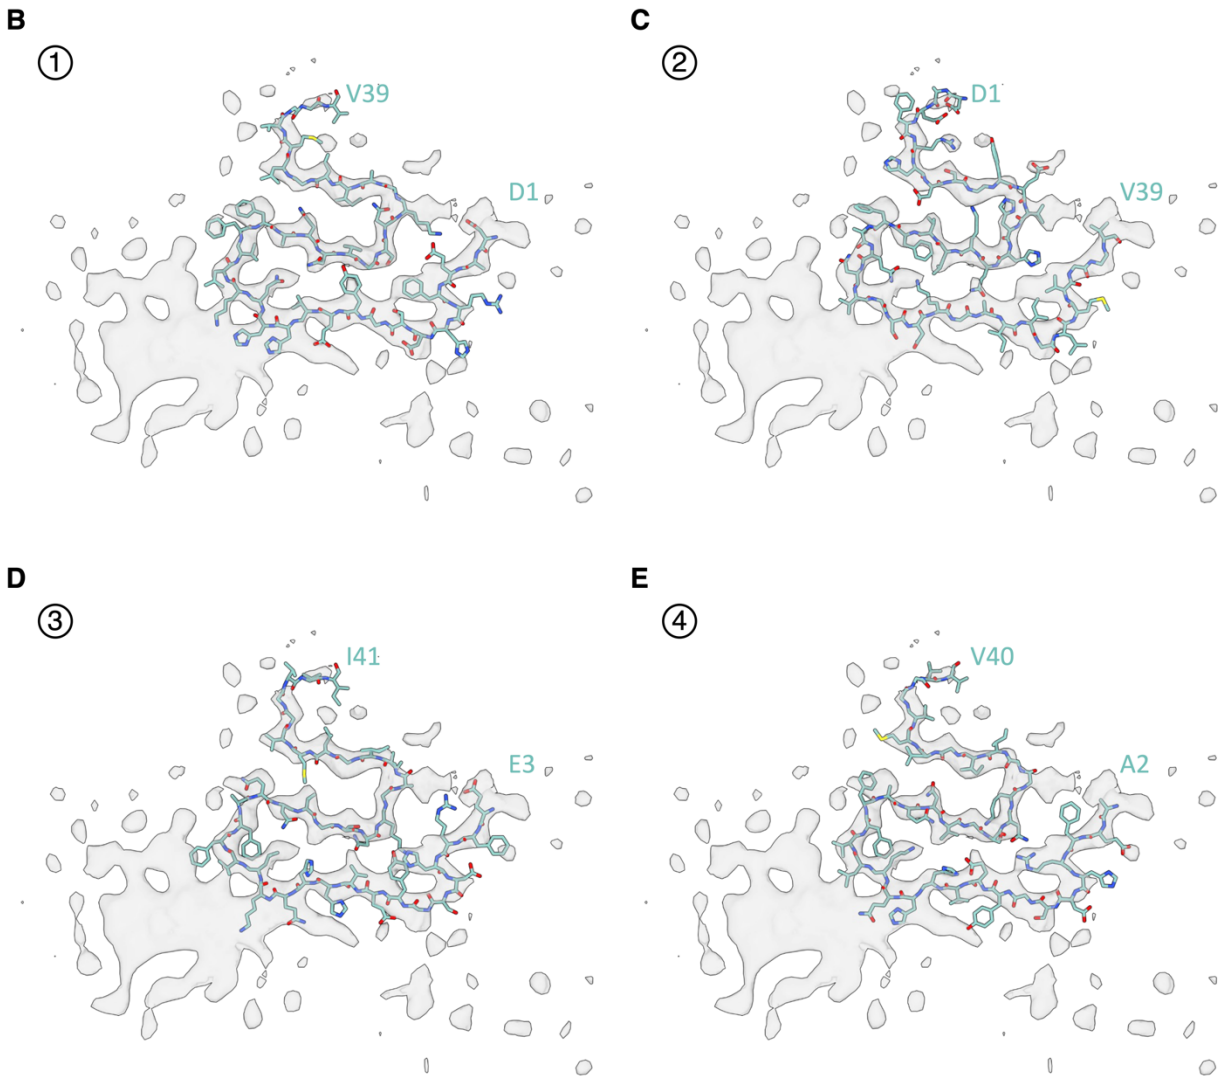

**Figure S4:** DireX analysis of DI2. (A) The table contains the C<sub>work</sub> and C<sub>free</sub> values from the DireX fitting of all possible eight sequence assignments (black box) in both possible C<sub>α</sub>-chain directions into the DI2 density maps. The C<sub>free</sub> value was used to rank the results. The N-terminus of the sequence is coloured in grey, the C-terminus is coloured in green. (B) The most favourable sequence fit. (C)-(E) The 2nd to 4th most favourable sequence fit.

5

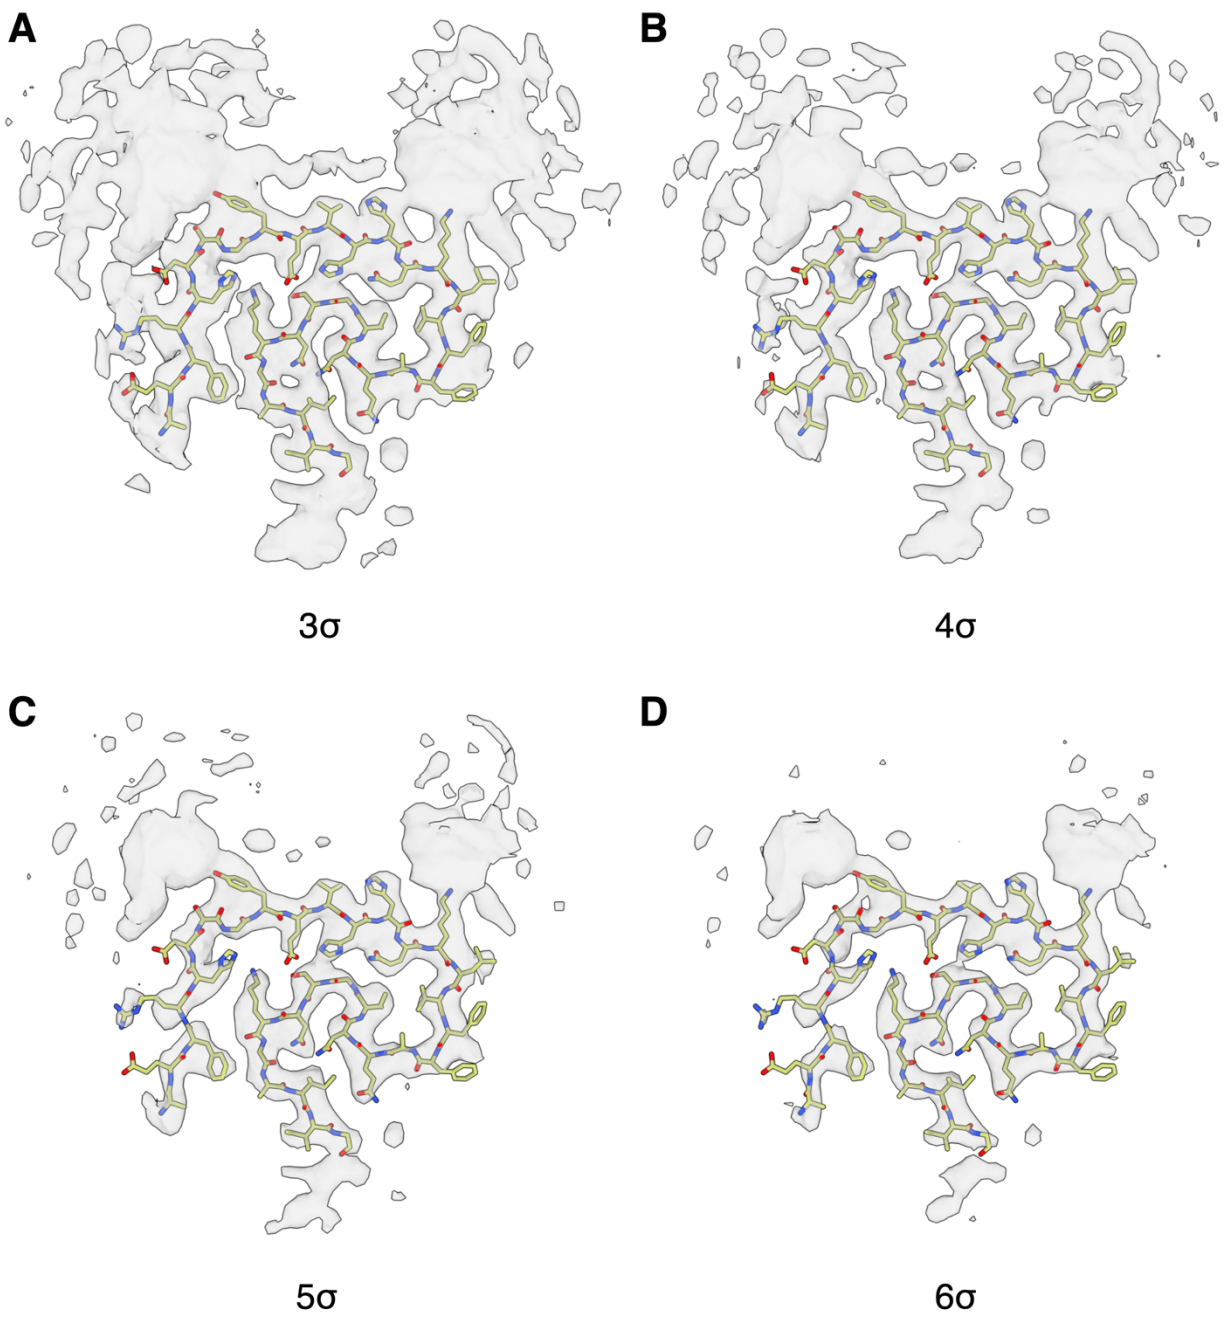

**Figure S5:** DI3 density map at different thresholds. At (A)  $3\sigma$ , (B)  $4\sigma$ , (C)  $5\sigma$ , and (D)  $6\sigma$ .



**A**

|    | C <sub>free</sub> | C <sub>work</sub> | 1                                                                                   | 32                                                                                  |
|----|-------------------|-------------------|-------------------------------------------------------------------------------------|-------------------------------------------------------------------------------------|
| 1  | 0.21486           | 0.83129           | D A E F R H D S G Y E V H H Q K L V F F A E D V G S N K G A I I G L M V G G V V I A |                                                                                     |
| 2  | 0.20279           | 0.788             |                                                                                     | D A E F R H D S G Y E V H H Q K L V F F A E D V G S N K G A I I G L M V G G V V I A |
| 3  | 0.19498           | 0.79647           |                                                                                     | D A E F R H D S G Y E V H H Q K L V F F A E D V G S N K G A I I G L M V G G V V I A |
| 4  | 0.18539           | 0.80618           | D A E F R H D S G Y E V H H Q K L V F F A E D V G S N K G A I I G L M V G G V V I A |                                                                                     |
| 5  | 0.17551           | 0.80869           | D A E F R H D S G Y E V H H Q K L V F F A E D V G S N K G A I I G L M V G G V V I A |                                                                                     |
| 6  | 0.16756           | 0.79798           |                                                                                     | D A E F R H D S G Y E V H H Q K L V F F A E D V G S N K G A I I G L M V G G V V I A |
| 7  | 0.16304           | 0.7844            | D A E F R H D S G Y E V H H Q K L V F F A E D V G S N K G A I I G L M V G G V V I A |                                                                                     |
| 8  | 0.15993           | 0.78889           |                                                                                     | D A E F R H D S G Y E V H H Q K L V F F A E D V G S N K G A I I G L M V G G V V I A |
| 9  | 0.15597           | 0.80193           | A I V V G G V M L G I I A G K N S G V D E A F F V L K Q H H V E Y G S D H R F E A D |                                                                                     |
| 10 | 0.15094           | 0.78938           |                                                                                     | D A E F R H D S G Y E V H H Q K L V F F A E D V G S N K G A I I G L M V G G V V I A |
| 11 | 0.1497            | 0.79756           |                                                                                     | D A E F R H D S G Y E V H H Q K L V F F A E D V G S N K G A I I G L M V G G V V I A |
| 12 | 0.14226           | 0.7817            |                                                                                     | A I V V G G V M L G I I A G K N S G V D E A F F V L K Q H H V E Y G S D H R F E A D |
| 13 | 0.14006           | 0.7828            |                                                                                     | A I V V G G V M L G I I A G K N S G V D E A F F V L K Q H H V E Y G S D H R F E A D |
| 14 | 0.13798           | 0.79018           | A I V V G G V M L G I I A G K N S G V D E A F F V L K Q H H V E Y G S D H R F E A D |                                                                                     |
| 15 | 0.13771           | 0.80256           |                                                                                     | A I V V G G V M L G I I A G K N S G V D E A F F V L K Q H H V E Y G S D H R F E A D |
| 16 | 0.13592           | 0.79658           |                                                                                     | A I V V G G V M L G I I A G K N S G V D E A F F V L K Q H H V E Y G S D H R F E A D |
| 17 | 0.13524           | 0.8013            |                                                                                     | A I V V G G V M L G I I A G K N S G V D E A F F V L K Q H H V E Y G S D H R F E A D |
| 18 | 0.13382           | 0.78705           |                                                                                     | A I V V G G V M L G I I A G K N S G V D E A F F V L K Q H H V E Y G S D H R F E A D |
| 19 | 0.12439           | 0.78646           | A I V V G G V M L G I I A G K N S G V D E A F F V L K Q H H V E Y G S D H R F E A D |                                                                                     |
| 20 | 0.1177            | 0.76346           |                                                                                     | A I V V G G V M L G I I A G K N S G V D E A F F V L K Q H H V E Y G S D H R F E A D |
| 21 | 0.11127           | 0.79328           | D A E F R H D S G Y E V H H Q K L V F F A E D V G S N K G A I I G L M V G G V V I A |                                                                                     |
| 22 | 0.09261           | 0.78783           | A I V V G G V M L G I I A G K N S G V D E A F F V L K Q H H V E Y G S D H R F E A D |                                                                                     |

**B**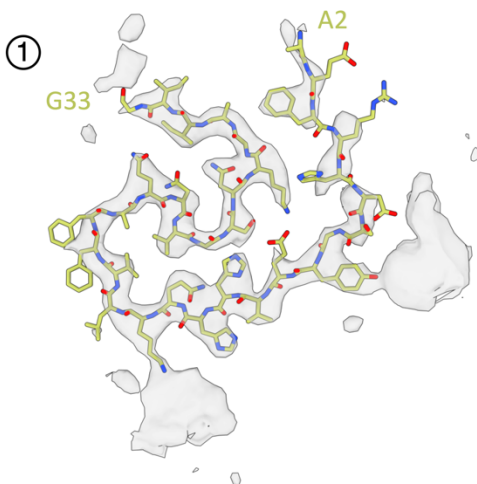**C**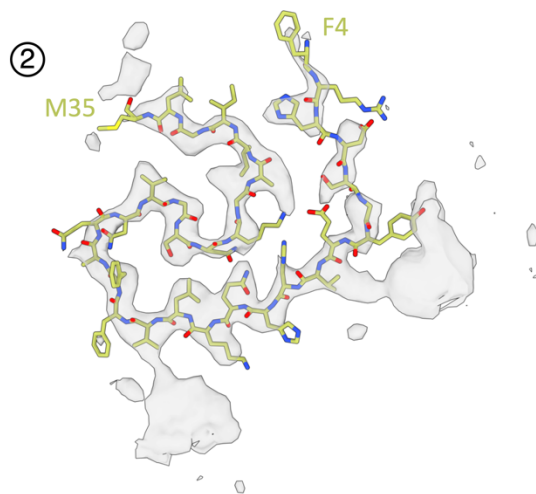**D**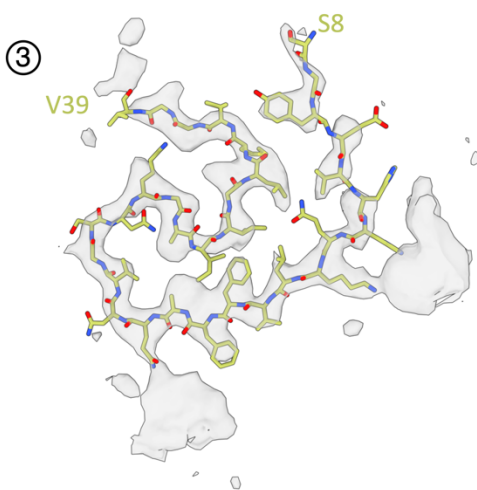**E**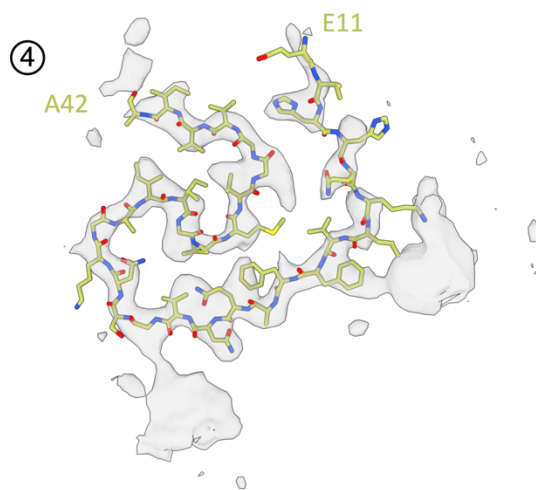

**Figure S6:** DireX analysis of DI3. (A) The table contains the C<sub>work</sub> and C<sub>free</sub> values from the DireX fitting of all possible 22 sequence assignments (black box) in both possible C<sub>α</sub>-chain directions into the DI3 density maps. The C<sub>free</sub> value was used to rank the results. The N-terminus of the

sequence is coloured in grey, the C-terminus is coloured in green. (B) The most favourable sequence fit. (C)-(E) The 2nd to 4th most favourable sequence fit.

## Supplementary Tables

**Table S1:** Distribution of polymorphs in extracted A $\beta$  fibril samples from different mouse models. The term “unassigned” refers to particles that were originally picked by crYOLO but discarded because they were false positives or of too low quality for high-resolution reconstruction.

5

| Mouse Model              | Distribution                                             |
|--------------------------|----------------------------------------------------------|
| APP/PS1                  | murine type III: 12.2%; unassigned: 87.8%                |
| ARTE10                   | type II: 13.2%; murine type III: 0.6%; unassigned: 86.2% |
| tg-SwDI                  | DI1: 3.6%; DI2: 2.6%; DI3: 0.7%; unassigned: 93.1%       |
| tg-APP <sub>Swe</sub>    | type II: 1.7%; unassigned: 98.3%                         |
| APP23                    | type II: 10%; unassigned: 90%                            |
| tg-APP <sub>ArcSwe</sub> | murine <sub>Arc</sub> type I: 4.4%; unassigned: 95.6%    |
